# Supplementary material
Source: PubMed Central journal article supplement (PMC2673731)
Supplement: NIHMS99482-supplement-supplement_1.pdf [file NIHMS99482-supplement-supplement_1.pdf]

*Supplemental Materials*

**Supplemental Figure 1.** ClustalW amino acid sequence alignment among mosquito carboxypeptidases showing chemically-related amino acids in the same color. The numbering of the residues in the alignment is according to domain 2 of human procarboxypeptidase A2 (PDB code: 1AYE). Residues involved in zinc metal binding, disulfide bridge formation, and enzymatic catalysis are labeled. An amino acid residue at the position 255 that differentiates carboxypeptidase A from B enzymatic activity is indicated by an asterisk.

**Supplemental Figure 2.** ClustalW nucleotide sequence alignment among mosquito carboxypeptidases using the corresponding protein coding sequences used in supplemental figure 1. Nucleotides are color coded.

**Supplemental Table 1.** Gene-specific primers used for real-time PCR.
